# Supplementary material for: Graphynes: ideal supports of single atoms for electrochemical energy conversion
Source: Royal Society of Chemistry journal article supplement (doi:10.1039/d1ta09659a), 2022-01-01
Supplement: d1ta09659a1.pdf [file d1ta09659a1.pdf]

### Supplementary Information

Graphynes: the ideal supports of single atoms for electrochemical energy conversion

Bisheng Li,<sup>a, \*</sup> Shuning Yu,<sup>a</sup> Mingzhu Zhou,<sup>b</sup> Cheng Chen,<sup>a</sup> Cui Lai,<sup>c</sup> Mingming Zhang,<sup>c</sup> Hongjun Lin,<sup>a, \*</sup>

<sup>a</sup> College of Geography and Environmental Sciences, Zhejiang Normal University, Jinhua, 321004, China

<sup>b</sup> Institute of Nanochemistry and Nanobiology, Shanghai University, Shanghai, China

<sup>c</sup> College of Environmental Science and Engineering, Hunan University and Key Laboratory of Environmental Biology and Pollution Control (Hunan University), Ministry of Education, Changsha 410082, Hunan, China

---

\* Corresponding author at: College of Geography and Environmental Sciences, Zhejiang Normal University, Jinhua, 321004, China. E-mail address: LBSheng@zjnu.edu.cn and hjlin@zjnu.cn.

Table S1 The performance of GYs-supported SCAs and other various electrocatalysts for ORR.

| Electrocatalysts                      | Electrolyte | Mass loading<br>(mg cm <sup>-2</sup> ) | Onset<br>potential (V) | Half-wave<br>potential (V) | Tafel slope<br>(mV dec <sup>-1</sup> ) | Stability    | References |
|---------------------------------------|-------------|----------------------------------------|------------------------|----------------------------|----------------------------------------|--------------|------------|
| Fe-GDY                                | 0.1 M KOH   | 0.49                                   | 0.98                   | 0.87                       | 63                                     | 12 h         | 1          |
| NiFe-DG                               | 0.1 M KOH   | 0.38                                   | 0.97                   | 0.86                       | 71                                     | 5000 cycles  | 2          |
| Fe-PBC                                | 0.1 M KOH   | 0.15                                   | 1.01                   | 0.86                       | -                                      | 1000 h       | 3          |
| NPCTC                                 | 0.1 M KOH   | 0.10                                   | 0.92                   | 0.83                       | -                                      | 10000 s      | 4          |
| Fe@MNC-1                              | 0.1 M KOH   | 0.05                                   | 1.01                   | 0.88                       | 54                                     | 10000 s      | 5          |
| Fe-NCCs                               | 0.1 M KOH   | 0.10                                   | 0.93                   | 0.82                       | -                                      | 10000 cycles | 6          |
| Fe <sub>1</sub> Co <sub>1</sub> -CNF  | 0.1 M KOH   | 0.20                                   | 0.99                   | 0.87                       | 88                                     | 10000 s      | 7          |
| FeCo-N-HCN                            | 0.1 M KOH   | 0.10                                   | 0.98                   | 0.86                       | 52                                     | 35 000 s     | 8          |
| Co <sub>3</sub> O <sub>4-x</sub> @NSC | 0.1 M KOH   | -                                      | 0.82                   | 0.78                       | 63                                     | 1000 cycles  | 9          |
| Zn,Co-N <sub>x</sub> -C-Sy            | 0.1 M KOH   | 0.30                                   | 1.07                   | 0.84                       | 50                                     | 20000 s      | 10         |
| FCPA-900                              | 0.1 M KOH   | 0.40                                   | 0.91                   | 0.84                       | 60                                     | 30000 s      | 11         |

|                                         |           |      |      |      |    |              |    |
|-----------------------------------------|-----------|------|------|------|----|--------------|----|
| defect Mn <sub>3</sub> O <sub>4</sub>   | 0.1 M KOH | -    | 0.87 | 0.65 | 98 | 20000 s      | 12 |
| Co <sub>9</sub> S <sub>8</sub> @N-S-HPC | 0.1 M KOH | 0.26 | 0.99 | 0.85 | 75 | 5000 cycles  | 13 |
| Co <sub>0.05</sub> N <sub>1</sub> _pCNT | 0.1 M KOH | 0.20 | 1.00 | 0.87 | -  | 5000 cycles  | 14 |
| FeBNC                                   | 0.1 M KOH | 0.60 | 0.97 | 0.83 | 69 | 35000 s      | 15 |
| CoNC700                                 | 0.1 M KOH | 0.15 | 0.96 | 0.85 | 78 | 10000 cycles | 16 |
| Mn/C-NO                                 | 0.1 M KOH | 0.30 | -    | 0.86 | -  | 5000 cycles  | 17 |
| MnNPC-900                               | 0.1 M KOH | 0.25 | 0.95 | 0.84 | -  | 10000 s      | 18 |
| CoN <sub>4</sub> /NG                    | 0.1 M KOH | 0.24 | 0.98 | 0.87 | 70 | 36000 s      | 19 |
| HNCSs                                   | 0.1 M KOH | 0.20 | 0.92 | 0.82 | 66 | 10 h         | 20 |
| Co@Co <sub>3</sub> O <sub>4</sub> /NC-2 | 0.1 M KOH | 0.25 | -    | 0.81 | -  | 10000 s      | 21 |

Table S2 The performance of GYs-supported SCAs and other various electrocatalysts for OWS.

| Electrocatalysts                                         | Electrolyte                          | Mass loading<br>(mg cm <sup>-2</sup> ) | Overpotential <sub>10</sub><br>for HER (mV) | Overpotential <sub>10</sub><br>for OER (mV) | Cell voltage <sub>10</sub><br>(V) | Stability   | References |
|----------------------------------------------------------|--------------------------------------|----------------------------------------|---------------------------------------------|---------------------------------------------|-----------------------------------|-------------|------------|
| Ru/GDY                                                   | 0.5 M H <sub>2</sub> SO <sub>4</sub> | 0.48                                   | 44                                          | 531                                         | 1.81                              | -           | 22         |
| Co-doped MoS <sub>2</sub>                                | 0.5 M H <sub>2</sub> SO <sub>4</sub> | 2.00                                   | 60                                          | 540                                         | 1.90                              | 50000 s     | 23         |
| RuO <sub>2</sub> /Co <sub>3</sub> O <sub>4</sub> RuCo@NC | 0.5 M H <sub>2</sub> SO <sub>4</sub> | 0.35                                   | 141                                         | 247                                         | 1.66                              | 8 h         | 24         |
| PBAs@PANI                                                | 0.5 M H <sub>2</sub> SO <sub>4</sub> | 0.35                                   | 170                                         | 330                                         | 1.74                              | 10 h        | 25         |
| CoP-Mo <sub>2</sub> C@NC/CC                              | 0.5 M H <sub>2</sub> SO <sub>4</sub> | 1.80                                   | 107                                         | 330                                         | 1.67                              | 8           | 26         |
| Ni <sub>5</sub> P <sub>4</sub>                           | 0.5 M H <sub>2</sub> SO <sub>4</sub> | 3.50                                   | 140                                         | -                                           | 1.70                              | -           | 27         |
| FeP NTs                                                  | 0.5 M H <sub>2</sub> SO <sub>4</sub> | 1.60                                   | 88                                          | -                                           | 1.69                              | 14 h        | 28         |
| ONPPGC/OCC                                               | 0.5 M H <sub>2</sub> SO <sub>4</sub> | 0.10                                   | 109                                         | 470                                         | 1.77                              | 10 h        | 29         |
| Ir <sub>6</sub> Ag <sub>9</sub> NTs/C                    | 0.5 M H <sub>2</sub> SO <sub>4</sub> | 0.20                                   | 20                                          | 285                                         | 1.55                              | 1000 cycles | 30         |
| IrNi <sub>0.57</sub> Fe <sub>0.82</sub>                  | 0.5 M HClO <sub>4</sub>              | 0.09                                   | 24                                          | 284                                         | 1.64                              | 20000 s     | 31         |
| AuCu@IrNi                                                | 0.1 M HClO <sub>4</sub>              | -                                      | 13                                          | 308                                         | 1.59                              | 24 h        | 32         |
| MoSe <sub>2</sub> /MoO <sub>2</sub> /CNT-M               | 0.5 M H <sub>2</sub> SO <sub>4</sub> | -                                      | 97                                          | -                                           | 1.63                              | 10 h        | 33         |

---

|                                        |                                      |      |    |     |      |             |    |
|----------------------------------------|--------------------------------------|------|----|-----|------|-------------|----|
| Ultrasmall Ir NPs                      | 0.5 M HClO <sub>4</sub>              | 0.09 | -  | 290 | 1.58 | 20000 s     | 34 |
| Ir WNWs                                | 0.5 M HClO <sub>4</sub>              | 0.03 | 16 | 270 | 1.62 | 40000 s     | 35 |
| Ir/g-C <sub>3</sub> N <sub>4</sub> /NG | 0.5 M H <sub>2</sub> SO <sub>4</sub> | 0.07 | 22 | 287 | 1.56 | 24000 s     | 36 |
| Ir <sub>2</sub> Ni/C                   | 0.5 M H <sub>2</sub> SO <sub>4</sub> | 0.32 | 30 | 292 | 1.60 | 10000 s     | 37 |
| IrCoNi PHNC                            | 0.5 M H <sub>2</sub> SO <sub>4</sub> | 0.01 | 68 | 309 | 1.56 | 1000 cycles | 38 |
| NC-CNT/CoP                             | 0.5 M H <sub>2</sub> SO <sub>4</sub> | 1.5  | 62 | 400 | 1.65 | 20 h        | 39 |
| IrCo Nanodendrite                      | 0.1 M HClO <sub>4</sub>              | 0.09 | 17 | 281 | 1.60 | 20000 s     | 40 |

---

Table S3 The performance of GYs-supported SCAs and other various electrocatalysts for NRR.

| Electrocatalysts              | Electrolyte                            | Mass loading<br>(mg cm <sup>-2</sup> ) | Ammonia yield<br>(μg h <sup>-1</sup> mg <sub>cat.</sub> <sup>-1</sup> ) | FE (%) | Stability | References |
|-------------------------------|----------------------------------------|----------------------------------------|-------------------------------------------------------------------------|--------|-----------|------------|
| Mo <sup>0</sup> /GDY          | 0.1 M Na <sub>2</sub> SO <sub>4</sub>  | -                                      | 145.4                                                                   | 21.0   | -         | 41         |
| Mo <sup>0</sup> /GDY          | 0.1 M HCl                              | -                                      | 2.0                                                                     | 15.6   | -         | 41         |
| Pd <sup>0</sup> -GDY          | 0.1 M Na <sub>2</sub> SO <sub>4</sub>  | 0.0027                                 | 4450                                                                    | 31.6   | 6 cycles  | 42         |
| Pd <sup>0</sup> -GDY          | 0.1 M HCl                              | 0.0027                                 | 1580                                                                    | 4.3    | 6 cycles  | 42         |
| Pt SAs/WO <sub>3</sub>        | 0.1 M K <sub>2</sub> SO <sub>4</sub>   | 0.60                                   | 342.4                                                                   | 31.1   | 10 cycles | 43         |
| ISAS-Fe/NC                    | 0.1 M PBS                              | 1.00                                   | 62.9                                                                    | 18.6   | 24 h      | 44         |
| Fe-NC                         | 0.1 M Na <sub>2</sub> SO <sub>4</sub>  | 0.50                                   | 137.9                                                                   | 10.5   | 30 h      | 45         |
| MoSAs-Mo <sub>2</sub> C/NCNTs | 0.005 M H <sub>2</sub> SO <sub>4</sub> | 1.00                                   | 16.1                                                                    | 7.1    | 6 cycles  | 46         |
| Ru SAs/N-C                    | 0.05 M H <sub>2</sub> SO <sub>4</sub>  | 0.26                                   | 120.9                                                                   | 29.6   | 12 h      | 47         |
| Au/TiO <sub>2</sub>           | 0.1 M HCl                              | 1.00                                   | 21.4                                                                    | 8.1    | 10 cycles | 48         |
| GDY/Co <sub>2</sub> N         | 0.1 M Na <sub>2</sub> SO <sub>4</sub>  | -                                      | 123.7                                                                   | 35.8   | 7 cycles  | 49         |
| GDY/Co <sub>2</sub> N         | 0.1 M HCl                              | -                                      | 219.7                                                                   | 58.6   | 5 cycles  | 49         |

|                                                |                                       |       |      |      |           |    |
|------------------------------------------------|---------------------------------------|-------|------|------|-----------|----|
| Au/Ti <sub>3</sub> C <sub>2</sub>              | 0.1 M HCl                             | 0.003 | 30.1 | 18.3 | 15 h      | 50 |
| Fe-ReS <sub>2</sub> @N-CNF                     | 0.1 M Na <sub>2</sub> SO <sub>4</sub> | 1.00  | 80.4 | 12.3 | 10 cycles | 51 |
| PC/Sb/SbPO <sub>4</sub>                        | 0.1 M HCl                             | 0.20  | 25.0 | 31.0 | 30 h      | 52 |
| PdPb nanosponges                               | 0.1 M HCl                             | 0.20  | 25.7 | 5.8  | 10 h      | 53 |
| Au flowers                                     | 0.1 M HCl                             | 0.40  | 25.6 | 6.1  | 20 h      | 43 |
| Au <sub>1</sub> /C <sub>3</sub> N <sub>4</sub> | 0.005 H <sub>2</sub> SO <sub>4</sub>  | 0.89  | 1305 | 11.1 | -         | 54 |
| Mo-doped SnS <sub>2</sub>                      | 0.5 M LiClO <sub>4</sub>              | -     | 42.3 | 20.8 | 20 h      | 55 |
| FL-BP NSs                                      | 0.5 M H <sub>2</sub> SO <sub>4</sub>  | 0.20  | 31.3 | 5.1  | 5 cycles  | 56 |

## References:

1. Y. Jiao, Y. Zheng, M. Jaroniec and S. Z. Qiao, *J. Am. Chem. Soc.*, 2014, **136**, 4394-4403.
2. K. Khan, X. Yan, Q. Yu, S.-H. Bae, J. J. White, J. Liu, T. Liu, C. Sun, J. Kim, H.-M. Cheng, Y. Wang, B. Liu, K. Amine, X. Pan and Z. Luo, *Nano Energy*, 2021, **90**, 106488.
3. J. Lee, H. S. Kim, J.-H. Jang, E.-H. Lee, H.-W. Jeong, K.-S. Lee, P. Kim and S. J. Yoo, *ACS Sustain. Chem. Eng.*, 2021, **9**, 7863-7872.
4. Y. Li, Z. Yan, Q. Wang, H. Ye, M. Li, L. Zhu and X. Cao, *Electrochim. Acta*, 2018, **282**, 224-232.
5. X. Chen, N. Wang, K. Shen, Y. Xie, Y. Tan and Y. Li, *ACS Appl. Mater. Interfaces*, 2019, **11**, 25976-25985.
6. N. Jia, Q. Xu, F. Zhao, H.-X. Gao, J. Song, P. Chen, Z. An, X. Chen and Y. Chen, *ACS Appl. Energy Mater.*, 2018, **1**, 4982-4990.
7. Y. Wang, Z. Li, P. Zhang, Y. Pan, Y. Zhang, Q. Cai, S. R. P. Silva, J. Liu, G. Zhang, X. Sun and Z. Yan, *Nano Energy*, 2021, **87**, 106147.
8. H. Li, Y. Wen, M. Jiang, Y. Yao, H. Zhou, Z. Huang, J. Li, S. Jiao, Y. Kuang and S. Luo, *Adv. Funct. Mater.*, 2021, **31**, 2011289.
9. H. Liu, Z. Mai, X. Xu and Y. Wang, *Dalton T.*, 2020, **49**, 2880-2887.
10. D. Liu, B. Wang, H. Li, S. Huang, M. Liu, J. Wang, Q. Wang, J. Zhang and Y. Zhao, *Nano Energy*, 2019, **58**, 277-283.
11. N. Wang, Y. Li, Z. Guo, H. Li, S. Hayase and T. Ma, *J. Electrochem. Soc.*, 2018, **165**, G3080-G3086.
12. Y.-C. Zhang, S. Ullah, R. Zhang, L. Pan, X. Zhang and J.-J. Zou, *Appl. Catal. B: Environ.*, 2020, **277**, 119247.



13. S. Zhang, D. Zhai, T. Sun, A. Han, Y. Zhai, W.-C. Cheong, Y. Liu, C. Su, D. Wang and Y. Li, *Appl. Catal. B: Environ.*, 2019, **254**, 186-193.
14. S. H. Ahn, M. J. Klein and A. Manthiram, *Adv. Energy Mater.*, 2017, **7**, 1601979.
15. K. Yuan, S. Sfaelou, M. Qiu, D. Lützenkirchen-Hecht, X. Zhuang, Y. Chen, C. Yuan, X. Feng and U. Scherf, *ACS Energy Lett.*, 2018, **3**, 252-260.
16. G. Wan, P. Yu, H. Chen, J. Wen, C.-j. Sun, H. Zhou, N. Zhang, Q. Li, W. Zhao, B. Xie, T. Li and J. Shi, *Small*, 2018, **14**, 1704319.
17. Y. Yang, K. Mao, S. Gao, H. Huang, G. Xia, Z. Lin, P. Jiang, C. Wang, H. Wang and Q. Chen, *Adv. Mater.*, 2018, **30**, 1801732.
18. X. Zhu, R. Amal and X. Lu, *Small*, 2019, **15**, 1804524.
19. L. Yang, L. Shi, D. Wang, Y. Lv and D. Cao, *Nano Energy*, 2018, **50**, 691-698.
20. L. Chai, L. Zhang, X. Wang, L. Xu, C. Han, T.-T. Li, Y. Hu, J. Qian and S. Huang, *Carbon*, 2019, **146**, 248-256.
21. C. Qi, L. Zhang, G. Xu, Z. Sun, A. Zhao and D. Jia, *Appl. Surf. Sci.*, 2018, **427**, 319-327.
22. H. Yu, L. Hui, Y. Xue, Y. Liu, Y. Fang, C. Xing, C. Zhang, D. Zhang, X. Chen, Y. Du, Z. Wang, Y. Gao, B. Huang and Y. Li, *Nano Energy*, 2020, **72**, 104667.
23. Q. Xiong, X. Zhang, H. Wang, G. Liu, G. Wang, H. Zhang and H. Zhao, *Chem. Commun.*, 2018, **54**, 3859-3862.
24. Z. Fan, J. Jiang, L. Ai, Z. Shao and S. Liu, *ACS Appl. Mater. Interfaces*, 2019, **11**, 47894-47903.
25. L. Zhang, T. Meng, B. Mao, D. Guo, J. Qin and M. Cao, *RSC Adv.*, 2017, **7**, 50812-50821.
26. S. Dutta, A. Indra, H. Han and T. Song, *ChemSusChem*, 2018, **11**, 3956-3964.
27. M. Ledendecker, S. Krick Calderón, C. Papp, H.-P. Steinrück, M. Antonietti

- and M. Shalom, *Angew. Chem. Int. Ed.*, 2015, **54**, 12361-12365.
28. Y. Yan, B. Y. Xia, X. Ge, Z. Liu, A. Fisher and X. Wang, *Chem-Eur J.*, 2015, **21**, 18062-18067.
29. J. Lai, S. Li, F. Wu, M. Saqib, R. Luque and G. Xu, *Energy Environ.Sci.*, 2016, **9**, 1210-1214.
30. M. Zhu, Q. Shao, Y. Qian and X. Huang, *Nano Energy*, 2019, **56**, 330-337.
31. L. Fu, G. Cheng and W. Luo, *J. Mater. Chem. A*, 2017, **5**, 24836-24841.
32. J. Park, S. Choi, A. Oh, H. Jin, J. Joo, H. Baik and K. Lee, *Nanoscale Horiz.*, 2019, **4**, 727-734.
33. L. J. Yang, Y. Q. Deng, X. F. Zhang, H. Liu and W. J. Zhou, *Nanoscale*, 2018, **10**, 9268-9275.
34. L. Fu, X. Zeng, C. Huang, P. Cai, G. Cheng and W. Luo, *Inorg. Chem. Front.*, 2018, **5**, 1121-1125.
35. L. Fu, F. Yang, G. Cheng and W. Luo, *Nanoscale*, 2018, **10**, 1892-1897.
36. B. Jiang, T. Wang, Y. Cheng, F. Liao, K. Wu and M. Shao, *ACS Appl. Mater. Interfaces*, 2018, **10**, 39161-39167.
37. X. Zhao, Y. Chang, J. Ji, J. Jia and M. Jia, *RSC Adv.*, 2021, **11**, 33179-33185.
38. J. Feng, F. Lv, W. Zhang, P. Li, K. Wang, C. Yang, B. Wang, Y. Yang, J. Zhou, F. Lin, G.-C. Wang and S. Guo, *Adv. Mater.*, 2017, **29**, 1703798.
39. C. Guan, H. Wu, W. Ren, C. Yang, X. Liu, X. Ouyang, Z. Song, Y. Zhang, S. J. Pennycook, C. Cheng and J. Wang, *J. Mater. Chem. A*, 2018, **6**, 9009-9018.
40. L. Fu, X. Zeng, G. Cheng and W. Luo, *ACS Appl. Mater. Interfaces*, 2018, **10**, 24993-24998.
41. L. Hui, Y. Xue, H. Yu, Y. Liu, Y. Fang, C. Xing, B. Huang and Y. Li, *J. Am. Chem. Soc.*, 2019, **141**, 10677-10683.

42. H. Yu, Y. Xue, L. Hui, C. Zhang, Y. Fang, Y. Liu, X. Chen, D. Zhang, B. Huang and Y. Li, *Natl. Sci. Rev.*, 2021, **8**, 213.
43. Z. Wang, Y. Li, H. Yu, Y. Xu, H. Xue, X. Li, H. Wang and L. Wang, *ChemSusChem*, 2018, **11**, 3480-3485.
44. F. Lü, S. Zhao, R. Guo, J. He, X. Peng, H. Bao, J. Fu, L. Han, G. Qi, J. Luo, X. Tang and X. Liu, *Nano Energy*, 2019, **61**, 420-427.
45. C. He, Z.-Y. Wu, L. Zhao, M. Ming, Y. Zhang, Y. Yi and J.-S. Hu, *ACS Catal.*, 2019, **9**, 7311-7317.
46. Y. Ma, T. Yang, H. Zou, W. Zang, Z. Kou, L. Mao, Y. Feng, L. Shen, S. J. Pennycook, L. Duan, X. Li and J. Wang, *Adv. Mater.*, 2020, **32**, 2002177.
47. Z. Geng, Y. Liu, X. Kong, P. Li, K. Li, Z. Liu, J. Du, M. Shu, R. Si and J. Zeng, *Adv. Mater.*, 2018, **30**, 1803498.
48. M.-M. Shi, D. Bao, B.-R. Wulan, Y.-H. Li, Y.-F. Zhang, J.-M. Yan and Q. Jiang, *Adv. Mater.*, 2017, **29**, 1606550.
49. Y. Fang, Y. Xue, Y. Li, H. Yu, L. Hui, Y. Liu, C. Xing, C. Zhang, D. Zhang, Z. Wang, X. Chen, Y. Gao, B. Huang and Y. Li, *Angew. Chem. Int. Ed.*, 2020, **59**, 13021-13027.
50. D. Liu, G. Zhang, Q. Ji, Y. Zhang and J. Li, *ACS Appl. Mater. Interfaces*, 2019, **11**, 25758-25765.
51. F. Lai, N. Chen, X. Ye, G. He, W. Zong, K. B. Holt, B. Pan, I. P. Parkin, T. Liu and R. Chen, *Adv. Funct. Mater.*, 2020, **30**, 1907376.
52. X. Liu, H. Jang, P. Li, J. Wang, Q. Qin, M. G. Kim, G. Li and J. Cho, *Angew. Chem. Int. Ed.*, 2019, **58**, 13329-13334.
53. H. Zhao, D. Zhang, Z. Wang, Y. Han, X. Sun, H. Li, X. Wu, Y. Pan, Y. Qin, S. Lin, Z. Xu, J. Lai and L. Wang, *Appl. Catal. B: Environ.*, 2020, **265**, 118481.

54. X. Wang, W. Wang, M. Qiao, G. Wu, W. Chen, T. Yuan, Q. Xu, M. Chen, Y. Zhang, X. Wang, J. Wang, J. Ge, X. Hong, Y. Li, Y. Wu and Y. Li, *Sci. Bull.*, 2018, **63**, 1246-1253.
55. K. Chu, J. Wang, Y. Liu, Q. Li and Y. Guo, *J. Mater. Chem. A*, 2020, **8**, 7117-7124.
56. L. Zhang, L. X. Ding, G. F. Chen, X. Yang and H. Wang, *Angew. Chem. Int. Ed.* 2019, **131**, 2638 –2642.
